# Supplementary material for: Respiratory viruses associated with severe acute respiratory infection in children aged <5 years at a tertiary care hospital in Delhi, India during 2013–15
Source: PubMed Central journal article supplement (PMC11544518; doi:10.7189/jogh.14.04230), 2024-11-08
Supplement: jogh-14-04230-s001.pdf [file jogh-14-04230-s001.pdf]

Supplement

Figure S1: Age-distribution of select viruses [RSV, Influenza, hMPV & PIV] detected among SARI cases aged <5 years in Delhi (2013-15) [\* y axis scale is different for RSV]

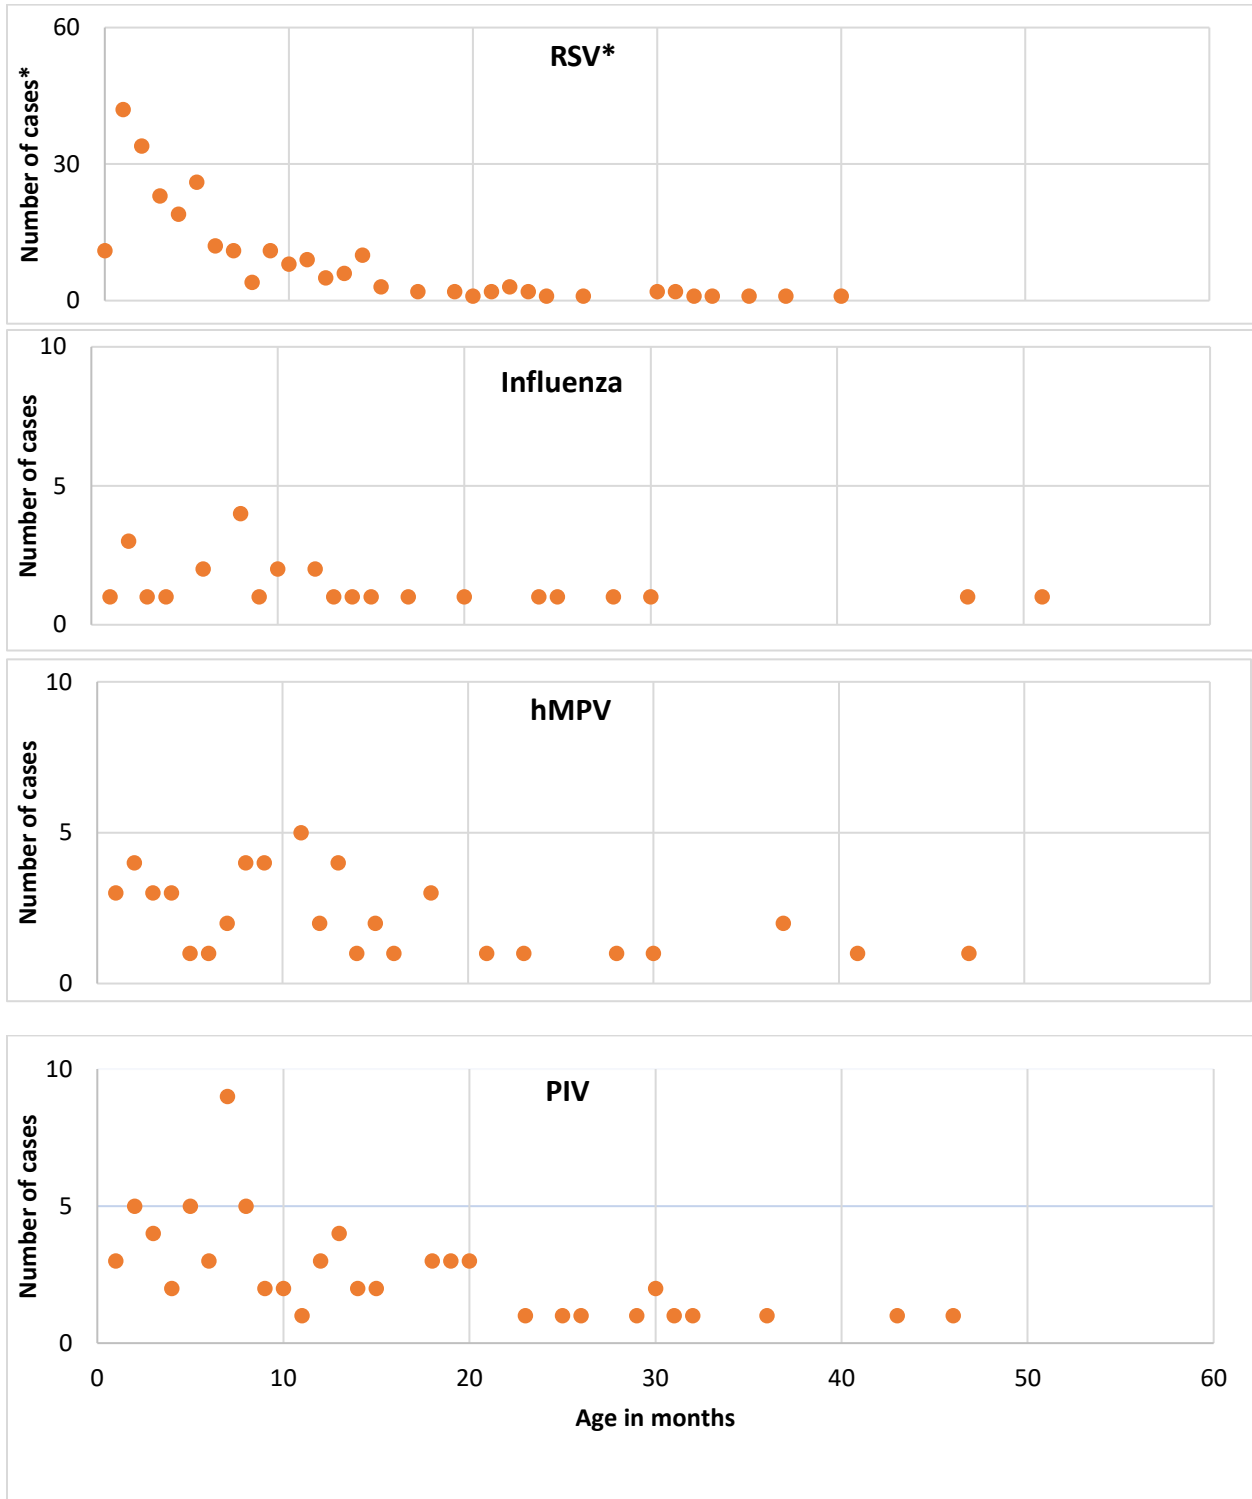

**Table S1. Clinical characteristics of children <5 years hospitalized with severe acute respiratory illness (SARI) at a tertiary care center in Delhi, India (2013-15)**

|                                               | PIV positive<br>(n=72) |      | hMPV positive<br>(n=51) |      | HCV positive<br>(n=36) |      |
|-----------------------------------------------|------------------------|------|-------------------------|------|------------------------|------|
|                                               | n                      | %    | N                       | %    | N                      | %    |
| <b>Symptoms &amp; signs</b>                   |                        |      |                         |      |                        |      |
| Cough                                         | 72                     | 100  | 51                      | 100  | 36                     | 100  |
| Fever                                         | 69                     | 95.8 | 50                      | 98   | 32                     | 88.9 |
| Breathlessness                                | 68                     | 94.4 | 49                      | 96.1 | 35                     | 97.2 |
| Noisy breathing                               | 51                     | 71.8 | 44                      | 88   | 30                     | 83.3 |
| Nasal discharge/congestion                    | 41                     | 56.9 | 37                      | 72.6 | 18                     | 50   |
| Diarrhoea                                     | 12                     | 16.7 | 6                       | 11.8 | 5                      | 13.9 |
| Earache                                       | 2                      | 2.8  | 1                       | 2    | 0                      | 0    |
| Rash                                          | 2                      | 2.8  | 0                       | 0    | 2                      | 5.6  |
| Tachypnoea                                    | 52                     | 72.2 | 37                      | 72.6 | 22                     | 61.1 |
| Wheeze                                        | 2                      | 2.8  | 0                       | 0    | 2                      | 5.6  |
| Any sign of respiratory distress <sup>s</sup> | 58                     | 80.6 | 32                      | 62.8 | 30                     | 83.3 |
| Lethargy                                      | 61                     | 84.7 | 40                      | 78.4 | 24                     | 66.7 |
| <b>Clinical management</b>                    |                        |      |                         |      |                        |      |
| Antibiotics                                   | 58                     | 80.6 | 37                      | 72.6 | 28                     | 77.8 |
| Antivirals                                    | 2                      | 2.8  | 0                       | 0    | 0                      | 0    |
| Supplemental O2                               | 48                     | 66.7 | 39                      | 76.5 | 23                     | 63.9 |
| Mechanical ventilation                        | 1                      | 1.4  | 1                       | 2    | 1                      | 2.8  |
| Deaths (n=700)                                | 1                      | 1.4  | 0                       | 0    | 1                      | 2.8  |

**Table S2: Co-detection of viruses among SARI cases**

|                    | RSV | Rhinovirus | hMPV | Adenovirus | Enterovirus | Influenza | PIV |
|--------------------|-----|------------|------|------------|-------------|-----------|-----|
| <b>Rhinovirus</b>  | 22  |            |      |            |             |           |     |
| <b>HMPV</b>        | 5   | 9          |      |            |             |           |     |
| <b>Adenovirus</b>  | 7   | 14         | 2    |            |             |           |     |
| <b>Enterovirus</b> | 3   | 15         | 1    | 1          |             |           |     |
| <b>Influenza</b>   | 2   | 2          | 2    | 1          | 1           |           |     |
| <b>PIV</b>         | 4   | 8          | 2    | 2          | 2           | 4         |     |
| <b>HCV</b>         | 4   | 3          | 1    | 1          | 0           | 2         | 2   |

**Table S3: Antibiotic use among SARI cases**

| <b>Name of antibiotic</b>              | <b>No. of SARI cases prescribed/given</b> |
|----------------------------------------|-------------------------------------------|
| Amoxicillin                            | 392                                       |
| Aminoglycoside (Gentamicin)            | 278                                       |
| Amoxicillin/Clavulanate (Augmentin)    | 199                                       |
| Ceftriaxone                            | 172                                       |
| Vancomycin                             | 49                                        |
| Meropenem                              | 22                                        |
| Macrolide (Azithromycin, Erythromycin) | 21                                        |
| Piperacillin and tazobactam            | 14                                        |
| Linezolid                              | 3                                         |
| Metronidazole                          | 3                                         |
| Colistin                               | 2                                         |
| Cotrimoxazole                          | 2                                         |
| Others*                                | 7                                         |

\*One each [Artesunate; Ciprofloxacin; Cefixime; Ceftazidime; Amphotericin B; Netilmicin; Anti TB drugs (Rifampicin, Isoniazid, Pyrazinamide, Ethambutol)]

\*\*Antiviral (Oseltamivir) was provided to seven SARI cases (7/838=1%)
